# Supplementary material
Source: publisher site journal article supplement (https://www.dovepress.com/article/591943)
Supplement: Supplementary file 1 [file 591943%20Supplementary%20Material.docx]

**Supplementary Table S1. Sequences of synthesized oligonucleotides used in the experiments.**

| **Aptamer** | **Sequence (5′→3′)** | **Modification(s)** | **Kd (nM)** |
| --- | --- | --- | --- |
| HApt | AACCGCCCAAATCCCTAA  GAGTCTGCACTTGTCATT  TTGTATATGTATTTGGTTT  TTGGCTCTCACAGACACA  CTACACACGCACA | 3′‑NH₂ | 18.9 (for HER2) |
| Scr (control) | AAAAAAAAAAAAAAACG  TGCAGTACGCCAACCTTT  CTCATGCGCTGCCCCTCTTA | 3′‑NH₂ | N/A |

**Supplementary Table S2**. **Size, PDI, and zeta potential of FSNPs and** **HApt-FSNPs.**

| Sample | Size (nm) | PDI | Zeta (mV) |
| --- | --- | --- | --- |
| FSNPs | 78.9 ± 4.7 | 0.131 ± 0.025 | −32.9 ± 2.9 |
| HApt-FSNPs | 86.6 ± 5.3 | 0.113 ± 0.017 | −38.3 ± 3.2 |

PDI, polydispersity index.


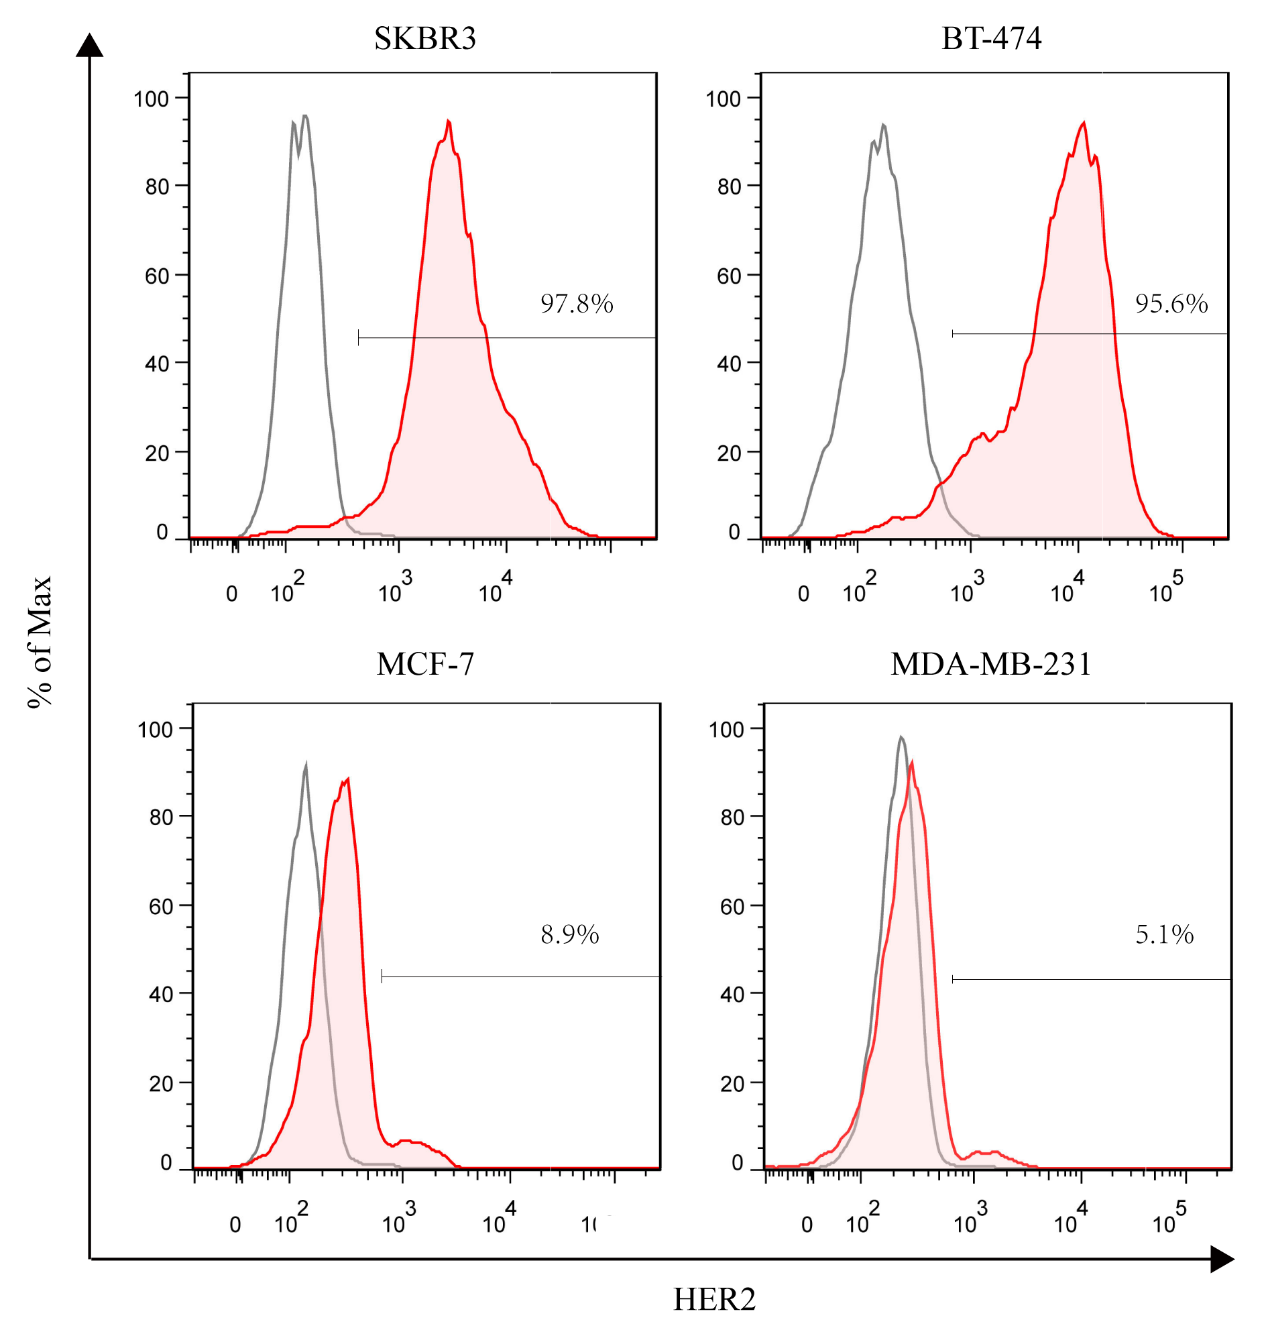


**Supplementary Figure 1. Flow cytometric assay for the expression of HER2 expression of** **SKBR3, BT-474, MCF-7, and MDA-MB-231 cells.**
